# Supplementary material
Source: PubMed Central journal article supplement (PMC6249092)
Supplement: NIHMS1503979-supplement-1.pdf [file NIHMS1503979-supplement-1.pdf]

## Food insecurity is associated with maladaptive eating behaviors and objectively measured overeating

Emma J. Stinson<sup>1</sup>, Susanne B. Votruba<sup>1</sup>, Colleen Venti<sup>1</sup>, Marisol Perez<sup>2</sup> Jonathan Krakoff<sup>1</sup>,

Marci E. Gluck<sup>1</sup>

<sup>1</sup> Obesity and Diabetes Clinical Research Section  
Phoenix Epidemiology and Clinical Research Branch  
National Institute of Diabetes and Digestive and Kidney Diseases  
National Institutes of Health, Phoenix, AZ, USA

<sup>2</sup> Department of Psychology, Arizona State University, Tempe, AZ, USA

### Corresponding Author:

Marci E. Gluck  
National Institute of Diabetes and Digestive and Kidney Diseases  
4212 N. 16<sup>th</sup>, Street  
Phoenix, AZ 85016  
Tel: 602-200-5317

**Supplementary Table S1. Participant Demographics**

| Variable                 | <i>Food Secure M (SD)</i> | <i>Food Insecure M (SD)</i> |
|--------------------------|---------------------------|-----------------------------|
| n                        | 36                        | 46                          |
| Race                     | 24O, 12W                  | 30O, 16W                    |
| Sex                      | 20m, 16f                  | 33m, 13f                    |
| Age                      | 39 (12)                   | 38 (11)                     |
| Education (yrs)          | 13 (2.1)                  | 12 (1.8)                    |
| SSS (US)*                | 5.0 (1.5)                 | 4.0 (1.9)                   |
| Weight (kg)*             | 79 (18)                   | 87 (19)                     |
| Height (m)               | 1.7 (0.1)                 | 1.7 (0.1)                   |
| BMI (kg/m <sup>2</sup> ) | 28 (6.2)                  | 30 (6.5)                    |
| FM                       | 24 (11)                   | 27 (12)                     |
| FFM                      | 55 (12)                   | 60 (11)                     |

O = Other; W = White; SSS = Subjective socioeconomic Status (US); FM = Fat Mass; FFM = Fat-free Mass

\* $p < .05$ , \*\* $p < .01$

**Supplementary Table S2.** Mean scores and correlations across all variables  
*Pearson Correlation Matrix among Body Adiposity, Eating Behaviors, and Energy Intake Measures*

|                        | 1    | 2     | 3      | 4     | 5     | 6     | 7     | 8     | 9      | 10    | 11    | 12  | 13    | 14    | 15    | 16    | 17   |
|------------------------|------|-------|--------|-------|-------|-------|-------|-------|--------|-------|-------|-----|-------|-------|-------|-------|------|
| 1. Age                 | -    |       |        |       |       |       |       |       |        |       |       |     |       |       |       |       |      |
| 2. Education(yrs)      | .18  | -     |        |       |       |       |       |       |        |       |       |     |       |       |       |       |      |
| 3. SSS (US)            | -.02 | .36** | -      |       |       |       |       |       |        |       |       |     |       |       |       |       |      |
| 4. Weight              | .13  | -.11  | -.20*  | -     |       |       |       |       |        |       |       |     |       |       |       |       |      |
| 5. Height              | .14  | .24*  | .22    | .35** | -     |       |       |       |        |       |       |     |       |       |       |       |      |
| 6. BMI                 | .06  | -.26* | -.35** | .84** | -.21* | -     |       |       |        |       |       |     |       |       |       |       |      |
| 7. FM                  | .11  | -.21  | -.33** | .81** | -.19  | .95** | -     |       |        |       |       |     |       |       |       |       |      |
| 8. FFM                 | .10  | .03   | .01    | .81** | .75*  | .40** | .30** | -     |        |       |       |     |       |       |       |       |      |
| 9. Cognitive Restraint | .10  | .32** | .16    | .05   | .07   | .01   | -.01  | .08   | -      |       |       |     |       |       |       |       |      |
| 10. Disinhibition      | .01  | -.02  | -.28*  | .25*  | -.13  | .34** | .38** | .03   | .10    | -     |       |     |       |       |       |       |      |
| 11. Hunger Cues        | .05  | -.07  | -.30** | .13   | -.14  | .23*  | .23*  | -.02  | -.02   | .70** | -     |     |       |       |       |       |      |
| 12. BES                | .05  | -.10  | -.31** | .19   | -.11  | .26*  | .30** | .01   | .16    | .67** | .57** | -   |       |       |       |       |      |
| 13. Total Kcal         | .13  | -.11  | -.03   | .24*  | .34*  | .04   | -.05  | .44** | -.29** | .11   | .20   | .08 | -     |       |       |       |      |
| 14. %WMEN              | .10  | -.12  | -.01   | .05   | .22*  | -.09  | -.16  | .25*  | -.32** | .09   | .21   | .06 | .97** | -     |       |       |      |
| 15. Fat                | .13  | -.14  | -.08   | .25*  | .33** | .05   | -.01  | .41** | -.23*  | .11   | .20   | .20 | .89** | .86** | -     |       |      |
| 16. Protein            | .24* | -.02  | -.02   | .18   | .37** | -.03  | -.14  | .42** | -.14   | .11   | .21   | .08 | .77** | .74** | .67** | -     |      |
| 17. Carbohydrates      | .06  | -.10  | .01    | .19   | .27*  | .04   | -.06  | .37** | -.30** | .08   | .16   | .01 | .92** | .90** | .67*  | .62** | -    |
| <i>M</i>               | 38   | 13    | 4.4    | 83    | 1.7   | 29    | 26    | 58    | 6.8    | 4.3   | 4.1   | 5.4 | 3353  | 123   | 1205  | 411   | 1777 |
| <i>SD</i>              | 12   | 1.9   | 1.8    | 19    | 0.1   | 6.5   | 12    | 12    | 4.2    | 2.9   | 2.9   | 5.7 | 1103  | 38    | 515   | 151   | 583  |

*Note:* SSS (US) Subjective socioeconomic status; FM Fat-Mass; FFM Fat-Free Mass; Cognitive Restraint subscale from the TFEQ; Disinhibition subscale from the TFEQ; Hunger Cues subscale from the TFEQ; BES Binge Eating Scale; %WMEN Weight Maintaining Energy Needs. \* $p < .05$ , \*\* $p < .01$
